# Supplementary material for: Transcriptional Response of Pectobacterium carotovorum to Cinnamaldehyde Treatment
Source: PubMed Central journal article supplement (PMC11016793; doi:10.4014/jmb.2311.11043), 2023-12-25
Supplement: jmb-34-3-538-supple.pdf [file jmb-34-3-538-supple.pdf]

**Supplementary Table and Figure****Table S1. Characteristics of the reads from Cinnamaldehyde treated or untreated libraries in *P. carotovorum* BP201601.**

| Sample id | Raw Data         |             | Trimmed Data     |             | GC(%) | Q20(%) | Q30(%) |
|-----------|------------------|-------------|------------------|-------------|-------|--------|--------|
|           | Total read bases | Total reads | Total read bases | Total reads |       |        |        |
| Control_1 | 2,477,476,066    | 24,529,466  | 2,442,723,772    | 24,285,292  | 46.48 | 99.09  | 96.65  |
| Control_4 | 2,204,472,258    | 21,826,458  | 2,174,337,119    | 21,610,870  | 45    | 99.08  | 96.57  |
| Control_5 | 3,700,367,098    | 36,637,298  | 3,649,263,753    | 36,287,172  | 47.07 | 99.02  | 96.36  |
| CA_500_3  | 2,493,741,308    | 24,690,508  | 2,171,545,627    | 21,799,246  | 47.6  | 98.95  | 96.22  |
| CA_500_4  | 2,360,851,164    | 23,374,764  | 1,955,194,234    | 19,778,542  | 48.18 | 98.96  | 96.22  |
| CA_500_5  | 3,111,102,798    | 30,802,998  | 705,590,814      | 7,247,982   | 44.16 | 98.74  | 95.75  |

**Table S2. Summary of RNA-seq alignment.**

| Sample ID | Processed reads | Mapped reads        | Failed to align reads | Multiplemapped reads |
|-----------|-----------------|---------------------|-----------------------|----------------------|
| Control_1 | 24,285,292      | 23,123,778 (95.22%) | 1,116,866 (4.60%)     | 44,648 (0.18%)       |
| Control_4 | 21,610,870      | 20,634,372 (95.48%) | 919,922 (4.26%)       | 56,576 (0.26%)       |
| Control_5 | 36,287,172      | 34,334,400 (94.62%) | 1,890,938 (5.21%)     | 61,834 (0.17%)       |
| CA_500_3  | 21,799,246      | 17,843,922 (81.86%) | 3,838,866 (17.61%)    | 116,458 (0.53%)      |
| CA_500_4  | 19,778,542      | 15,136,864 (76.53%) | 4,546,598 (22.99%)    | 95,080 (0.48%)       |
| CA_500_5  | 7,247,982       | 4,591,230 (63.34%)  | 2,641,490 (36.44%)    | 15,262 (0.21%)       |

**Table S3. Primers used in this study.**

| Gene            | Forwards             | Reverse              |
|-----------------|----------------------|----------------------|
| <i>16S rRNA</i> | GGCAGCAGTGGGGAATATTG | CTTTACGCCCAGTCATTCCG |
| <i>narX</i>     | GATGCCGATCCTGAACGAAC | CGCCATATTGCCCGTGTITA |
| <i>narL</i>     | GGACCCGGATTTGATTCTGC | GCAGCCAGTAAATCTTCCGG |
| <i>narH</i>     | TGAAACGTATGCTGGCGATG | TGAATTTGGTATCGCTGCCG |
| <i>narJ</i>     | GACTACCTGCCGCTGTATCT | ACCTGTTCTCTTCCCACAC  |
| <i>sucA</i>     | GACTCCGTGCTATCCGAAGA | CTCTGGACCTTGACCTTCGT |
| <i>odhB</i>     | GCGTCTTTGGCTCTCTGATG | TCCAGCATCTCTTTCACCGT |

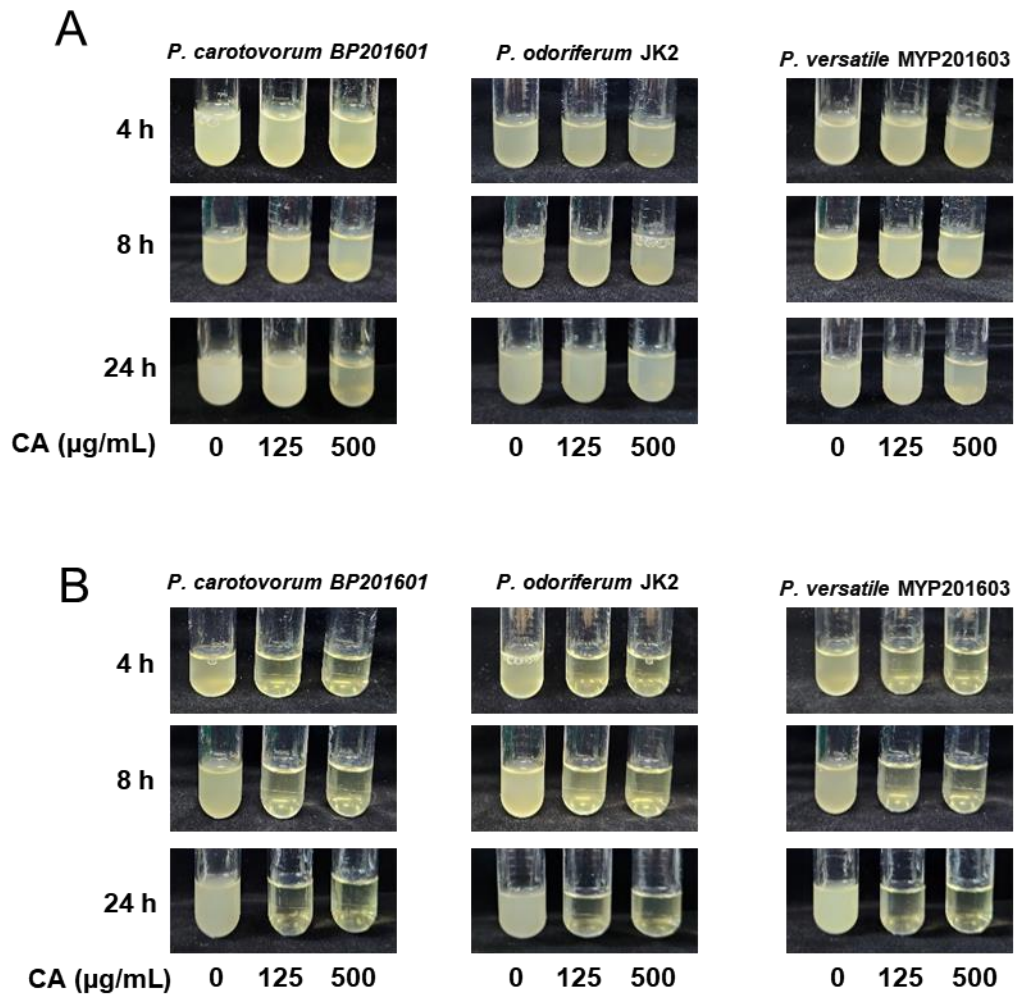

**Supplementary Fig. S1. Bactericidal effect of cinnamaldehyde on**

*Pectobacterium* spp. bactericidal effect of cinnamaldehyde on *P. carotovorum*

BP201601, *P. odoriferum* JK2 and *P. versatile* MYP201603 based on different

concentration values of  $1 \times 10^8$  CFU/mL (**A**) and  $1 \times 10^7$  CFU/mL (**B**).

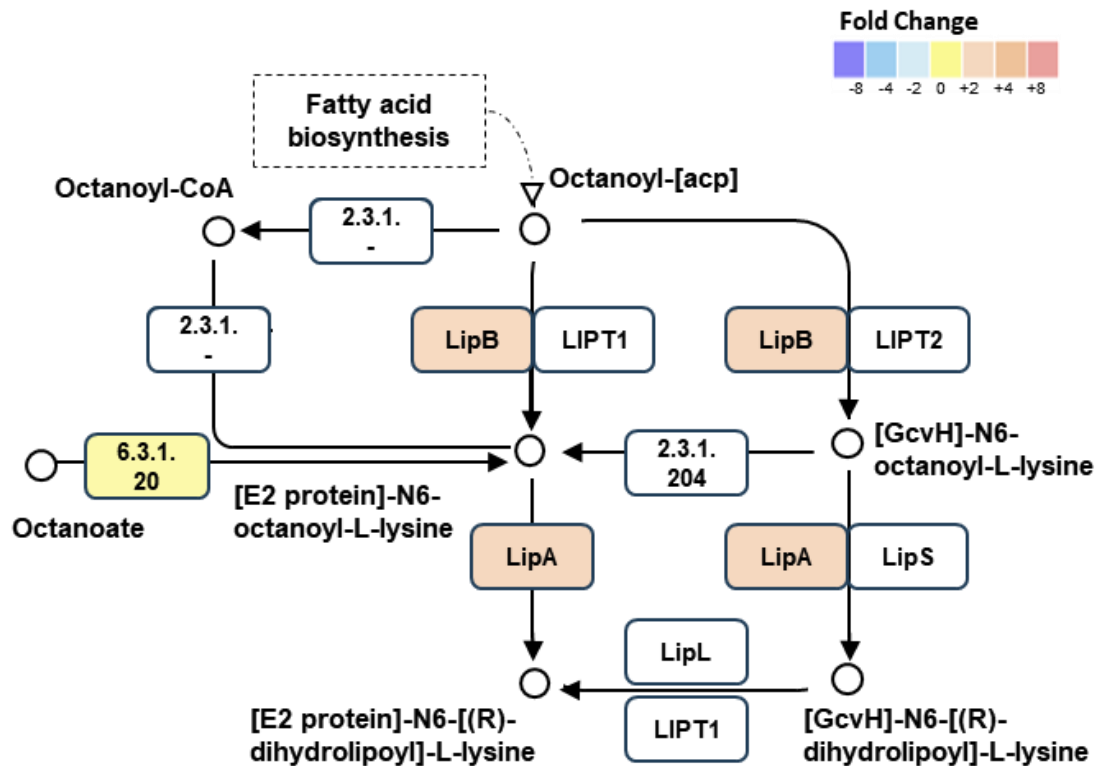

## Lipoic acid metabolism

**Supplementary Fig. 2. Pathways highlighting the differentially expressed genes identified in this study.** Up-regulated genes in the “Lipoic acid metabolism” pathway in RNA-seq. The scale represents the average fold change (FC) values between samples treated with cinnamaldehyde and the controls. The gene depicted in this figure are detailed in Supplementary File4.
